# Supplementary material for: Cancer-Specific Immune Prognostic Signature in Solid Tumors and Its Relation to Immune Checkpoint Therapies
Source: Cancers (Basel). 2020 Sep 1;12(9):2476. doi: 10.3390/cancers12092476 (PMC7563367; doi:10.3390/cancers12092476)
Supplement: Supplementary file 1 [file cancers-12-02476-s001.pdf]

# Supplementary Materials: Cancer-Specific Immune Prognostic Signature in Solid Tumors and Its Relation to Immune Checkpoint Therapies

Shaoli Das, Kevin Camphausen and Uma Shankavaram

## Supplementary Figures

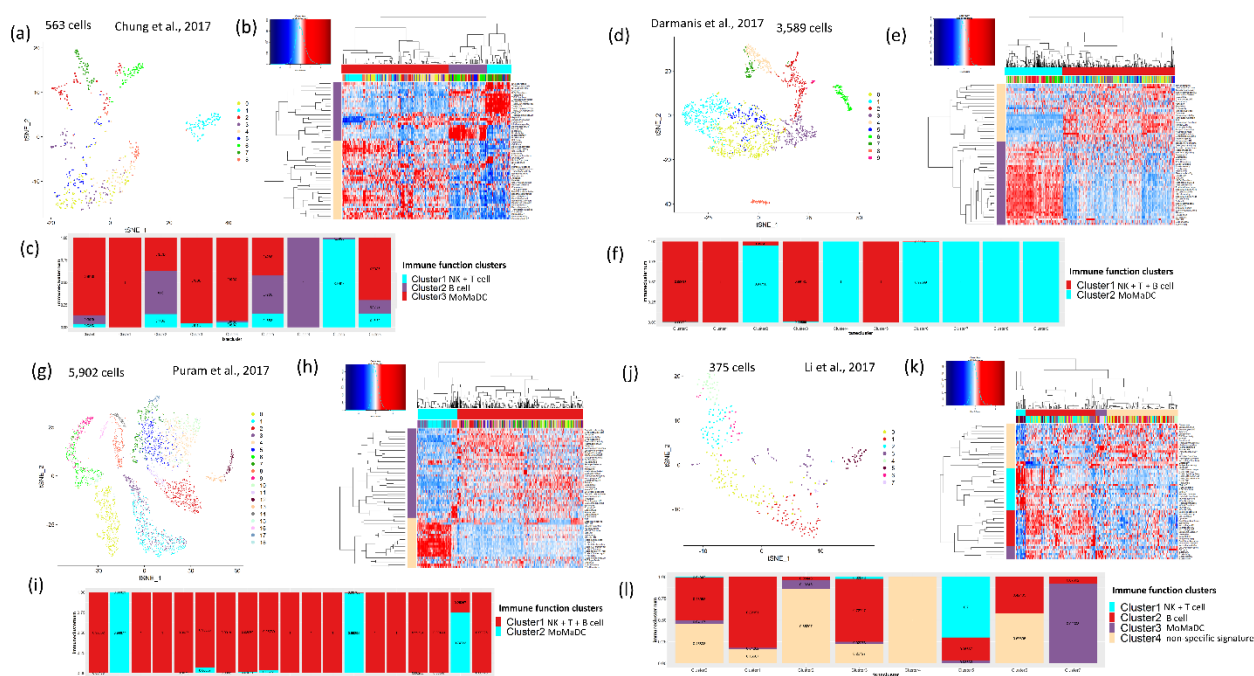

**Figure S1.** ssGSEA of scRNA-seq data of tumor samples from four solid tumor histologies (breast, colon, glioblastoma, and head and neck tumors) identifies three or two dominant immune-function-associated cell clusters. One of these clusters is enriched for monocytes, macrophages, dendritic cells (MoMaDC), another cluster is enriched for NK-, T-cells, and another is enriched for B-cell functions. For head and neck tumors and glioblastomas, B-cell enrichments does not form a distinct cluster but forms a unified cluster along with NK- and T-cells. (a) Analysis of a breast cancer scRNA-seq data set identifies nine cell clusters from unsupervised t-SNE clustering. (b) These clusters were assigned to three distinct sets of immune functions using ssGSEA, as seen from the heat map (one related to monocytes, macrophages, TLR and dendritic cells; one related to B-cell functions; and the other related to NK- and T-cell functions). (c) The stacked bar plot shows that cell clusters 1, 3, and 4 are enriched for functions related to monocytes, macrophages, and dendritic cells; the cell cluster 6 is enriched for B cell functions; and cell cluster 7 is enriched for NK- and T- related functions. (d) Analysis of a GBM scRNA-seq data set identifies 10 cell clusters from unsupervised t-SNE clustering. (e) These clusters were assigned to two distinct sets of immune functions using ssGSEA, as seen from the heat map (one related to monocytes, macrophages, TLR, dendritic cells and the other related to NK-, T- and B-cell functions). (f) The stacked bar plot shows that cell clusters 0, 1, 3, and 5 are enriched for functions related to monocytes, macrophages and dendritic cell and that cell clusters 2, 4, 6, 7, 8, and 9 are enriched for NK-, T- and B-cell related functions. (g) Analysis of a GBM scRNA-seq data set identifies 19 cell clusters from unsupervised t-SNE clustering. (h) These clusters were assigned to two distinct sets of immune functions using ssGSEA, as seen from the heat map (one related to monocytes, macrophages, TLR and dendritic cells and the other related to NK-, T- and B-cell functions). (i) The stacked bar plot shows that cell clusters 0, 2, 4, 5, 6, 7, 9, 10, 11, 12, 13, 14, 15, 16, 17, and 18 are enriched for functions related to monocytes, macrophages and dendritic cells and that cell clusters 1 and 3 are enriched for functions related to NK-, T- and B-cells. (j) Analysis of a colon cancer scRNA-seq data set

identifies eight cell clusters from unsupervised t-SNE clustering. (k) These clusters were assigned to four distinct sets of immune functions using ssGSEA, as seen from the heat map (one related to monocytes, macrophages, and dendritic cells; one related to B-cell functions; one related to NK- and T-cell functions; and one non-specific cluster). (l) The stacked bar plot shows that cell clusters 1, and 3 are enriched for functions related to monocytes, macrophages, and dendritic cells; the cell cluster 5 is enriched for NK- and T-cell functions; and cell cluster 7 is enriched for B-cell functions.

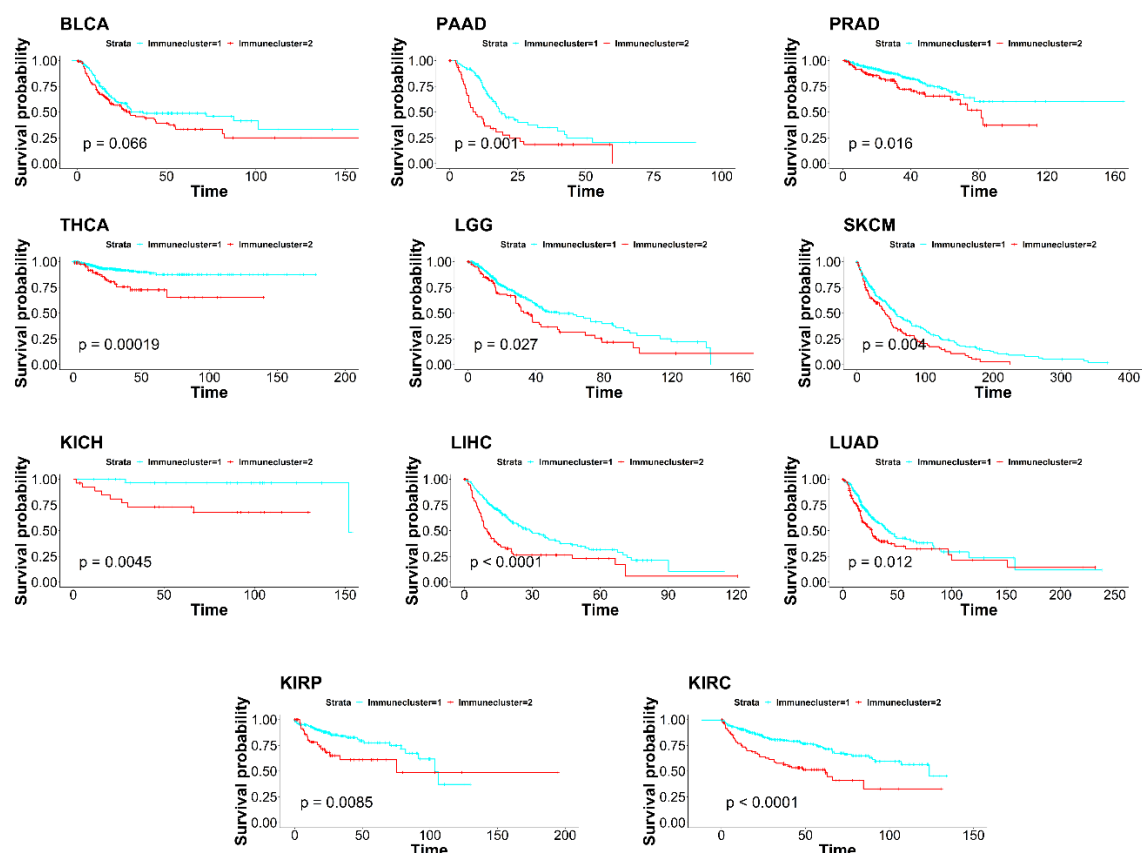

**Figure S2.** Kaplan-Meier analysis of cancer samples between the two sample clusters from the pan-cancer expression analysis of 155 immune signature genes (from Figure 3B) shows that in most cancer types (LGG, SKCM, LUAD, KIRC, KIRP, KICH, PRAD, PAAD, LIHC, THCA, and BLCA), cluster 1 (overexpression of bad prognosis genes) is significantly associated with poor disease-free survival.

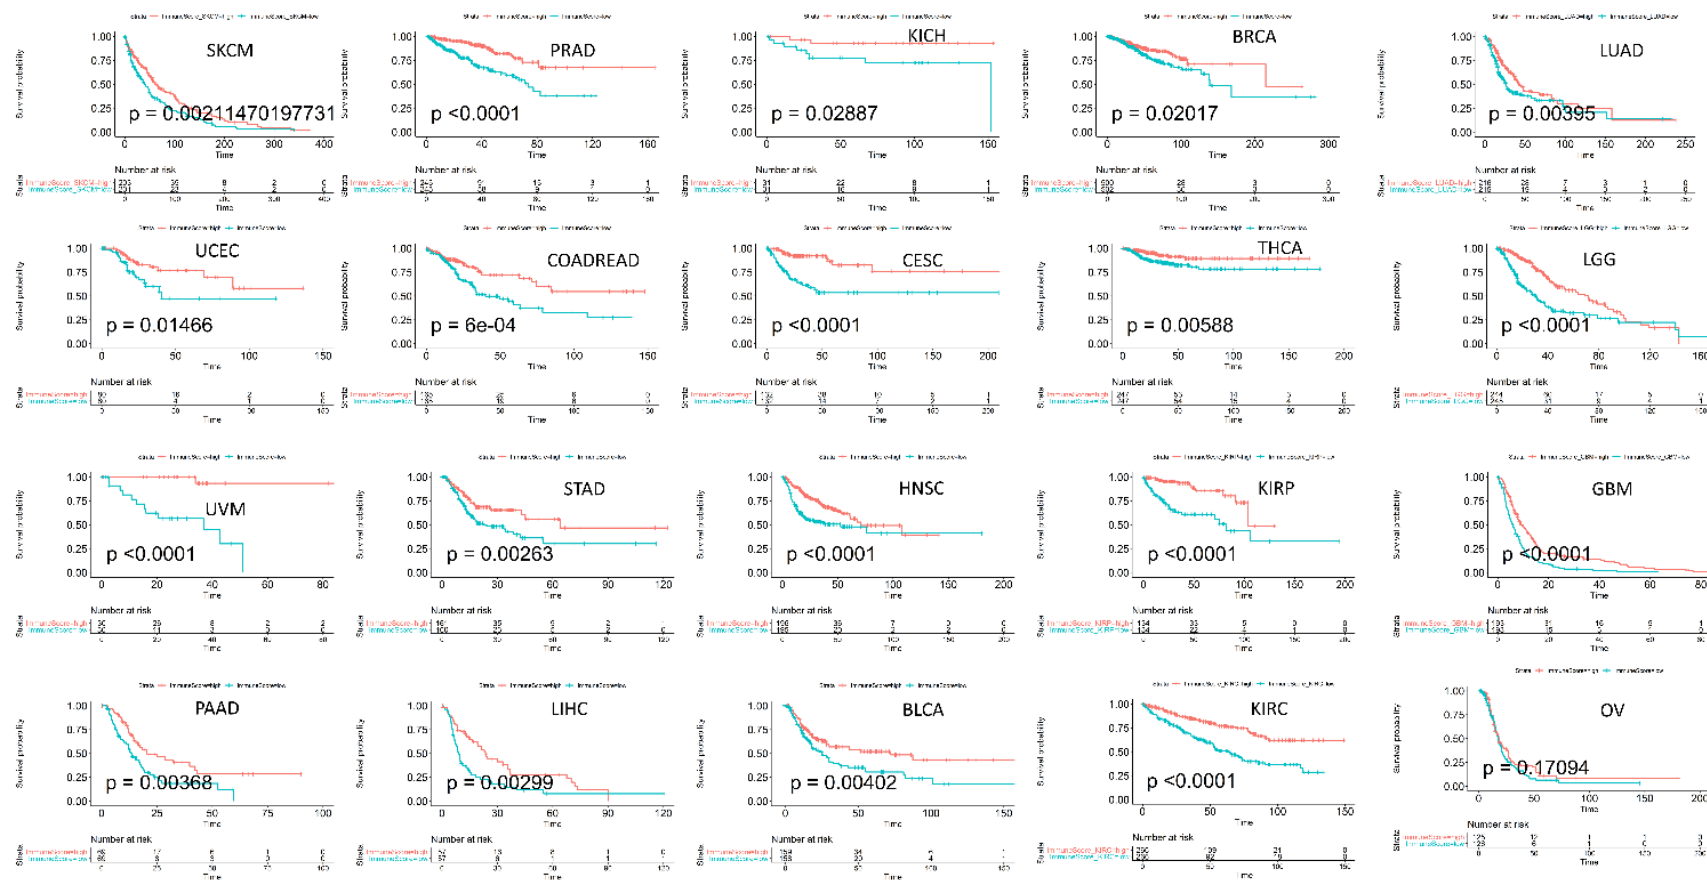

**Figure S3.** Kaplan-Meier analysis of disease-free survival of cancer samples stratified by high (>median, red line) or low (<median, blue line) immune scores specific for each of the 20 cancer types shows that high immune scores are significantly associated with better disease-free survival in all cancer types.

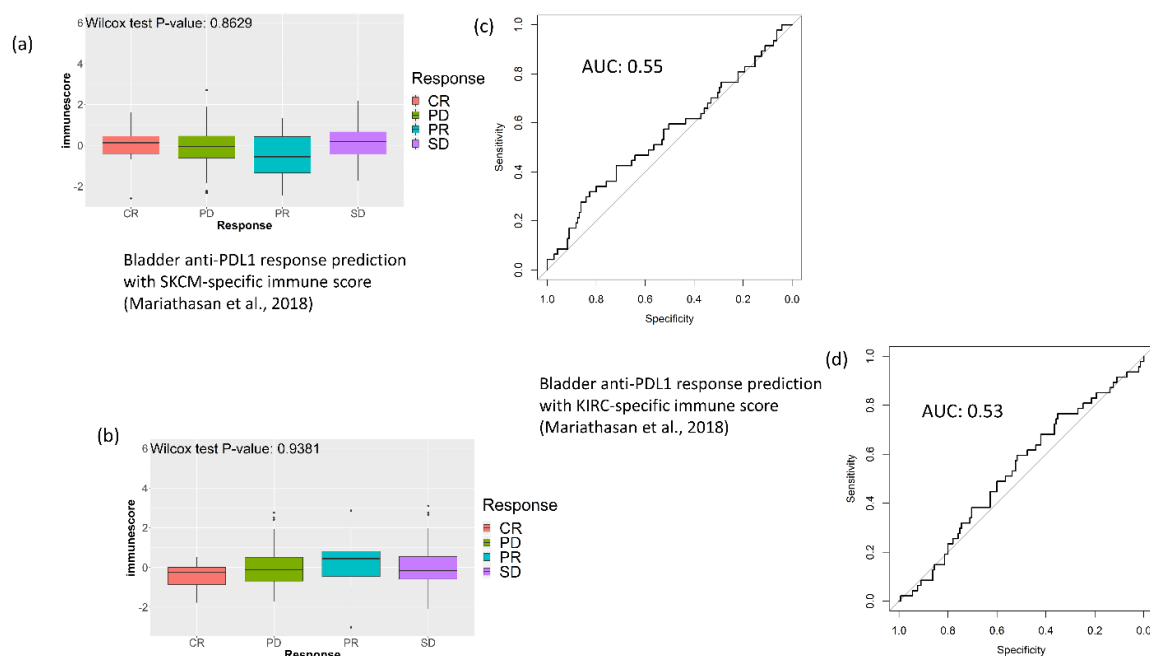

**Figure S4.** Immune score models for nonspecific cancer types could not predict response to checkpoint blockade therapy in bladder cancer (Mariathasan et al., 2018). (a–b) Immune score specific to SKCM (a) and KIRC (b) was not higher in tumors that responded (complete or partial response, CR/PR) compared to tumors that did not responded (standard or progressive disease, SD/PD) in anti-PDL1-treated bladder cancer patients. (c–d) Immune score specific to SKCM (c) and KIRC (d) could not predict objective response to anti-PDL1 treatment in bladder cancer patients. The AUC for predicting responsive tumors (CR/PR) versus non-responsive tumors (SD/PD) was close to that of random prediction (0.5).

**Table S1.** All genes associated with disease-free survival in 20 TCGA cancer types; chosen using elastic net and Kaplan-Meier analysis.

| Gene    | Cancer | Coeff    |
|---------|--------|----------|
| RPL31   | GBM    | 0.010127 |
| RPS16   | GBM    | 0.007807 |
| EIF3G   | GBM    | 0.021535 |
| PLOD2   | GBM    | -0.02265 |
| FRAT2   | GBM    | 0.220046 |
| MYD88   | GBM    | -0.02697 |
| TNFSF4  | GBM    | -0.10415 |
| VNN1    | GBM    | -0.01664 |
| SLC12A8 | GBM    | -0.03837 |
| SNX10   | GBM    | -0.06819 |
| CHI3L1  | GBM    | -0.03997 |
| BCL2A1  | GBM    | -0.24106 |
| CFLAR   | GBM    | -0.04284 |
| BANK1   | LGG    | -0.04219 |
| BCL7A   | LGG    | 0.05836  |
| CAPG    | LGG    | -0.02874 |
| CASP3   | LGG    | -0.03997 |
| CEACAM1 | LGG    | -0.04833 |
| CHST15  | LGG    | 0.03857  |

|           |      |          |
|-----------|------|----------|
| EIF3H     | LGG  | 0.018127 |
| TMEM255A  | LGG  | -0.02755 |
| FBXO6     | LGG  | -0.01493 |
| GIMAP2    | LGG  | -0.00525 |
| HESX1     | LGG  | -0.017   |
| HSH2D     | LGG  | -0.02217 |
| IL22RA1   | LGG  | -0.03903 |
| NPL       | LGG  | -0.05264 |
| PARP10    | LGG  | -0.00056 |
| PSEN2     | LGG  | -0.00546 |
| PSMB8     | LGG  | -0.00104 |
| RAG1      | LGG  | -0.02385 |
| RPL3      | LGG  | 0.002712 |
| RPL7      | LGG  | 0.004706 |
| SOCS1     | LGG  | -0.02082 |
| SPATS2L   | LGG  | -0.02545 |
| TNFAIP6   | LGG  | -0.01694 |
| TNFRSF12A | LGG  | -0.0436  |
| TRIM6     | LGG  | -0.0133  |
| BIRC5     | SKCM | 0.060904 |
| CD7       | SKCM | -0.15728 |
| CDC6      | SKCM | 0.012193 |
| CDCA2     | SKCM | -0.05299 |
| DDX58     | SKCM | -0.44534 |
| DDX60     | SKCM | 0.590045 |
| DEPDC1    | SKCM | -0.54929 |
| DONSON    | SKCM | 0.113839 |
| DTL       | SKCM | -0.15809 |
| ECT2      | SKCM | -0.25612 |
| GBP4      | SKCM | 0.056467 |
| GIN52     | SKCM | -0.69122 |
| IFITM1    | SKCM | 0.229638 |
| IL12A     | SKCM | 0.044932 |
| IL12RB2   | SKCM | -0.18564 |
| IL18RAP   | SKCM | 0.552766 |
| IRF1      | SKCM | -0.01035 |
| IRF7      | SKCM | 0.380559 |
| KLRC1     | SKCM | 0.311587 |
| KLRD1     | SKCM | 0.141009 |
| LAP3      | SKCM | 0.013529 |
| MKI67     | SKCM | 0.536968 |
| PARP12    | SKCM | 0.131166 |
| PYHIN1    | SKCM | 0.289861 |
| RACGAP1   | SKCM | -0.33746 |
| SKA1      | SKCM | -0.94405 |
| STAT1     | SKCM | 0.061859 |
| TLR2      | SKCM | 0.132438 |
| TLR8      | SKCM | 0.115879 |
| UBE2C     | SKCM | 0.036744 |
| CDCA2     | LUAD | -0.02714 |

|          |      |          |
|----------|------|----------|
| DEPDC1B  | LUAD | -0.11074 |
| DLGAP5   | LUAD | -0.06315 |
| DTL      | LUAD | -0.01635 |
| ECT2     | LUAD | -0.08089 |
| KIF14    | LUAD | -0.02378 |
| KIF20A   | LUAD | -0.04956 |
| MAD2L1   | LUAD | 0.011961 |
| SHCBP1   | LUAD | -0.00519 |
| SLC12A8  | KIRC | -0.40187 |
| AURKA    | KIRP | -0.0557  |
| AURKB    | KIRP | -0.03724 |
| BUB1     | KIRP | -0.01275 |
| CDC20    | KIRP | -0.06612 |
| CDCA8    | KIRP | -0.02403 |
| CDK1     | KIRP | -0.00902 |
| CDKN3    | KIRP | -0.00877 |
| CENPA    | KIRP | -0.02973 |
| CENPF    | KIRP | -0.03067 |
| DEPDC1   | KIRP | -0.0431  |
| EIF3E    | KIRP | -0.02167 |
| EIF3H    | KIRP | -0.04278 |
| FOXMI    | KIRP | -0.01895 |
| HJURP    | KIRP | -0.04352 |
| HMMR     | KIRP | -0.01766 |
| KIF11    | KIRP | -0.00188 |
| KIF18B   | KIRP | -0.04813 |
| KIF20A   | KIRP | -0.01681 |
| MKI67    | KIRP | -0.00906 |
| NCAPG2   | KIRP | -0.00523 |
| NDC80    | KIRP | -0.0141  |
| NUF2     | KIRP | -0.01939 |
| PLK4     | KIRP | -0.03815 |
| PTTG1    | KIRP | -0.0045  |
| RPL27    | KIRP | -0.03856 |
| RPL30    | KIRP | -0.00685 |
| RPL35A   | KIRP | -0.04144 |
| SERPING1 | KIRP | 0.190392 |
| SPC25    | KIRP | -0.07121 |
| TOP2A    | KIRP | -0.00297 |
| TPX2     | KIRP | -0.00618 |
| TRIP13   | KIRP | -0.01367 |
| UBE2C    | KIRP | -0.03484 |
| C1S      | LIHC | 0.027476 |
| IRF2     | LIHC | 0.005467 |
| MBOAT7   | LIHC | -0.01116 |
| MCM10    | LIHC | -0.00126 |
| MKI67    | LIHC | -0.01374 |
| RACGAP1  | LIHC | -0.01617 |
| RASGRP3  | LIHC | 0.001385 |
| REPS2    | LIHC | 0.096182 |

|           |      |          |
|-----------|------|----------|
| RRP12     | LIHC | -0.07219 |
| STMN1     | LIHC | -0.02358 |
| BCL2      | KICH | 0.16179  |
| EAF2      | KICH | 0.026256 |
| BANK1     | UVM  | -0.50914 |
| CDKN3     | UVM  | -0.34223 |
| CENPA     | UVM  | -0.02007 |
| RPL29     | UVM  | 0.034258 |
| RPS10     | UVM  | 0.010025 |
| RPS18     | UVM  | 0.018559 |
| RPS28     | UVM  | 0.235403 |
| RRM2      | UVM  | -0.00156 |
| SEC11C    | UVM  | -0.5662  |
| SPATS2    | UVM  | -0.01274 |
| KIR3DL1   | HNSC | 0.061815 |
| NFATC3    | HNSC | 0.051518 |
| RASSF5    | HNSC | 0.047304 |
| STAT3     | HNSC | 0.006566 |
| STX3      | HNSC | -0.04074 |
| TAL1      | HNSC | 0.024819 |
| TNFRSF12A | HNSC | -0.02452 |
| CDR2      | CESC | -0.06467 |
| FAM129C   | CESC | 0.103777 |
| FRK       | CESC | 0.031133 |
| TCL1A     | CESC | 0.140501 |
| TNFAIP6   | CESC | -0.04312 |
| VCAN      | CESC | -0.13779 |
| GUCY1B3   | UCEC | -0.13335 |
| SMPD3     | UCEC | 0.055162 |
| MAD2L1    | THCA | -0.01356 |
| CD69      | BRCA | 0.123017 |
| CTLA4     | OV   | 0.042074 |
| MZB1      | OV   | 0.17865  |
| SOCS1     | OV   | -0.06774 |
| TNFRSF17  | OV   | 0.009313 |
| ALOX12    | PRAD | -0.0046  |
| ASAP2     | PRAD | 0.022714 |
| ASGR1     | PRAD | -0.41033 |
| BIRC5     | PRAD | -0.03426 |
| CD38      | PRAD | 0.095152 |
| GMNN      | PRAD | -0.15365 |
| MAD2L1    | PRAD | -0.00822 |
| PTTG1     | PRAD | -0.03482 |
| SPOCK2    | PRAD | 0.000269 |
| STMN1     | PRAD | -0.094   |
| ZWINT     | PRAD | -0.0485  |
| CD44      | PAAD | -0.32402 |
| CDKN3     | PAAD | -0.20091 |
| CEP55     | PAAD | -0.04648 |
| ETS1      | PAAD | -0.20664 |

|        |          |          |
|--------|----------|----------|
| KIF20A | PAAD     | -0.49693 |
| TPX2   | PAAD     | -0.48558 |
| TTK    | PAAD     | -0.46591 |
| UBE2C  | PAAD     | -0.01529 |
| RCAN3  | COADREAD | 0.016729 |
| SOCS1  | COADREAD | 0.111016 |
| SPP1   | COADREAD | -0.06986 |
| VEGFA  | COADREAD | -0.0339  |
| CDCA7  | STAD     | 0.002116 |
| E2F8   | STAD     | 0.027942 |
| MELK   | STAD     | 0.02538  |
| NCAPG2 | STAD     | 0.011524 |
| STON2  | STAD     | -0.09419 |
| TNFSF4 | STAD     | -0.05426 |
| SIRPG  | BLCA     | 0.050077 |

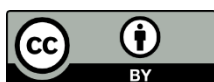

© 2020 by the authors. Licensee MDPI, Basel, Switzerland. This article is an open access article distributed under the terms and conditions of the Creative Commons Attribution (CC BY) license (<http://creativecommons.org/licenses/by/4.0/>).
